# Supplementary material
Source: MDPI journal article supplement (https://www.mdpi.com/2227-9040/11/1/56)
Supplement: s1 [file s1]

# Metal-Enhanced Fluorescence for Alpha-Fetoprotein Detection and for SERS Using Hybrid Nanoparticles of Magnetic Cluster Core—Plasmonic Shell Composite

Lam Gia Phuc <sup>1,2,†</sup>, Phuong Que Tran Do <sup>1,2,†</sup>, Hanh Kieu Thi Ta <sup>1,2</sup>, Vinh Quang Dang <sup>1,2</sup>, Sang-Woo Joo <sup>3</sup>, Do Hung Manh <sup>4</sup>, Ta Ngoc Bach <sup>4</sup>, Tran T. T. Van <sup>1,2</sup> and Nhu Hoa Thi Tran <sup>1,2,\*</sup>

<sup>1</sup> Faculty of Materials Science and Technology, University of Science, Ho Chi Minh City 700000, Vietnam;

<sup>2</sup> Vietnam National University, Ho Chi Minh City 700000, Vietnam

<sup>3</sup> Department of Information Communication, Materials, and Chemistry Convergence Technology, Soongsil University, Seoul 06978, Republic of Korea;

<sup>4</sup> Institute of Materials Science, Vietnam Academy of Science and Technology, Hanoi 100000, Vietnam;

\* Correspondence: ttnhoa@hcmus.edu.vn

† These authors contributed equally to this work.

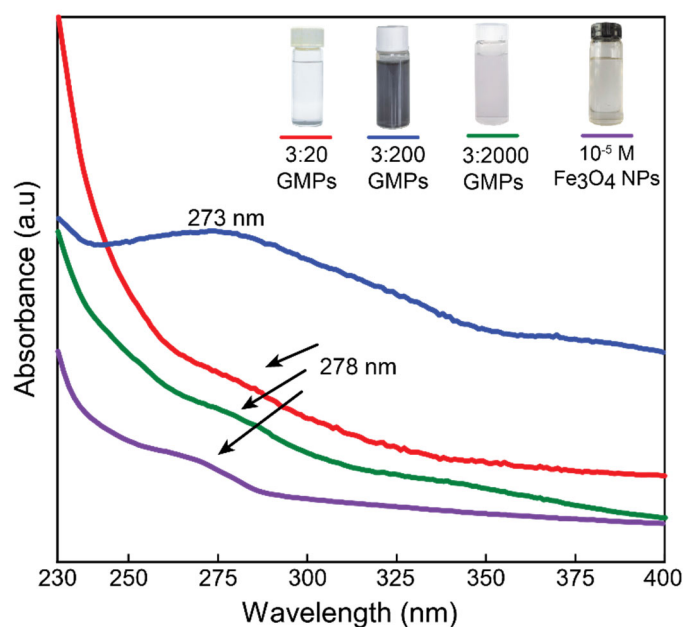

**Figure S1.** The UV-Vis spectra of  $10^{-5}$  M  $\text{Fe}_3\text{O}_4$  NPs and different ingredients ratio GMPs in the wavelength range from 230 to 400 nm.
